# Supplementary material for: A substantial oxygen isotope effect at O2 in the OMP decarboxylase reaction: Mechanistic implications
Source: Royal Society of Chemistry journal article supplement (doi:10.1039/b812979g), 2008-01-01
Supplement: b812979g_1.pdf [file b812979g_1.pdf]

## SUPPORTING INFORMATION: Mass Spectrometric Analysis of Isotope-enriched Compounds Used in the Study of OMP Decarboxylase

A Substantial Oxygen Isotope Effect at O2 in the OMP Decarboxylase Reaction: Mechanistic  
Implications

Wickliffe O. Wepukhulu, Vanessa L. Smiley, Bhargavi Vemulapalli, Jeffrey A. Smiley, Linda M.  
Phillips, and Jeehiun K. Lee

Department of Chemistry, Youngstown State University, Youngstown, OH 44555

Department of Chemistry and Chemical Biology, Rutgers University, Piscataway, NJ, 08854

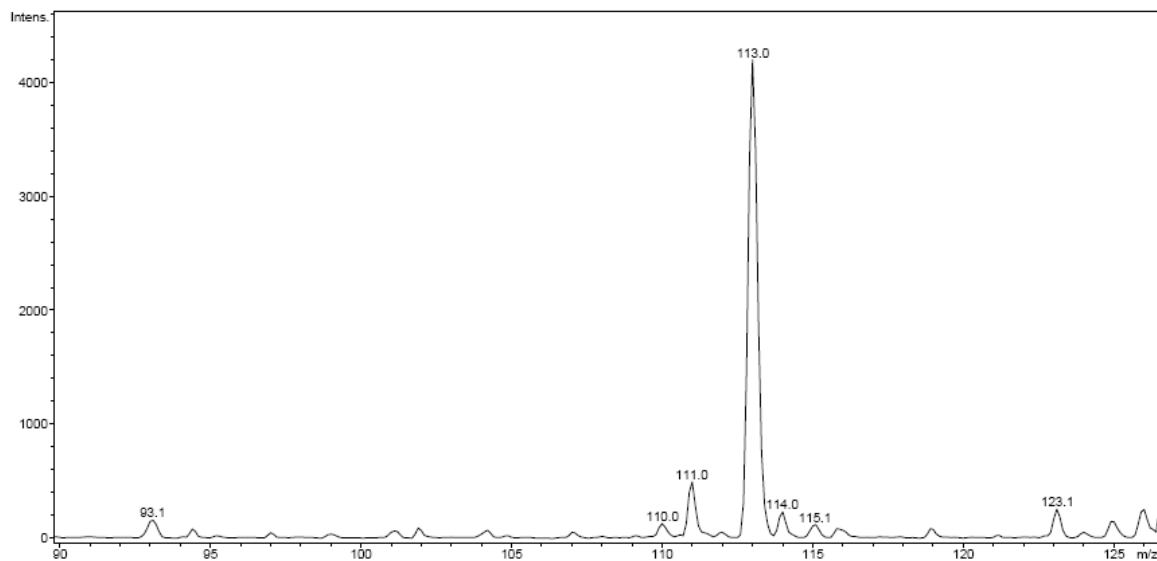

**Figure 1:** Mass spectrometric analysis of [ $^{18}\text{O}_2$ ] uracil following synthesis by hydrolysis of 2-ethylthiouracil in acidified  $\text{H}_2^{18}\text{O}$ . Data is for anion detection within the MS. Desired compound with single  $^{18}\text{O}$  incorporation has monoanion mass of 113.

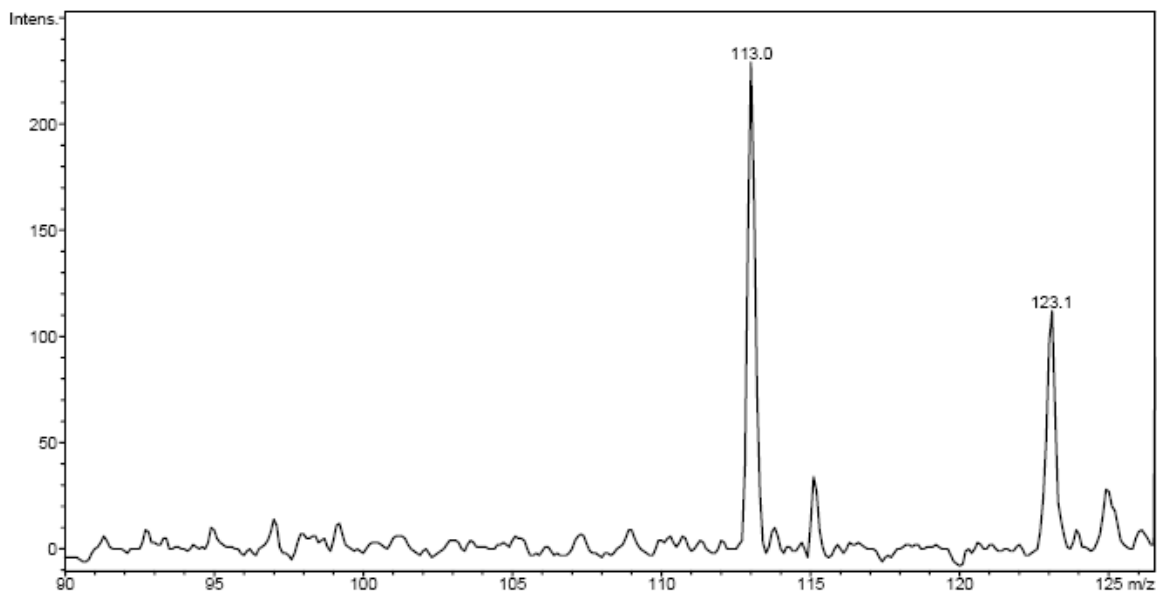

**Figure 2:** Mass spectrometric analysis of [ $^{18}\text{O}_2$ ] uracil following exposure to 0.5 M NaOH at room temperature for 8 days. Data is for anion detection within the MS. Desired compound with single  $^{18}\text{O}$  incorporation has monoanion mass of 113.

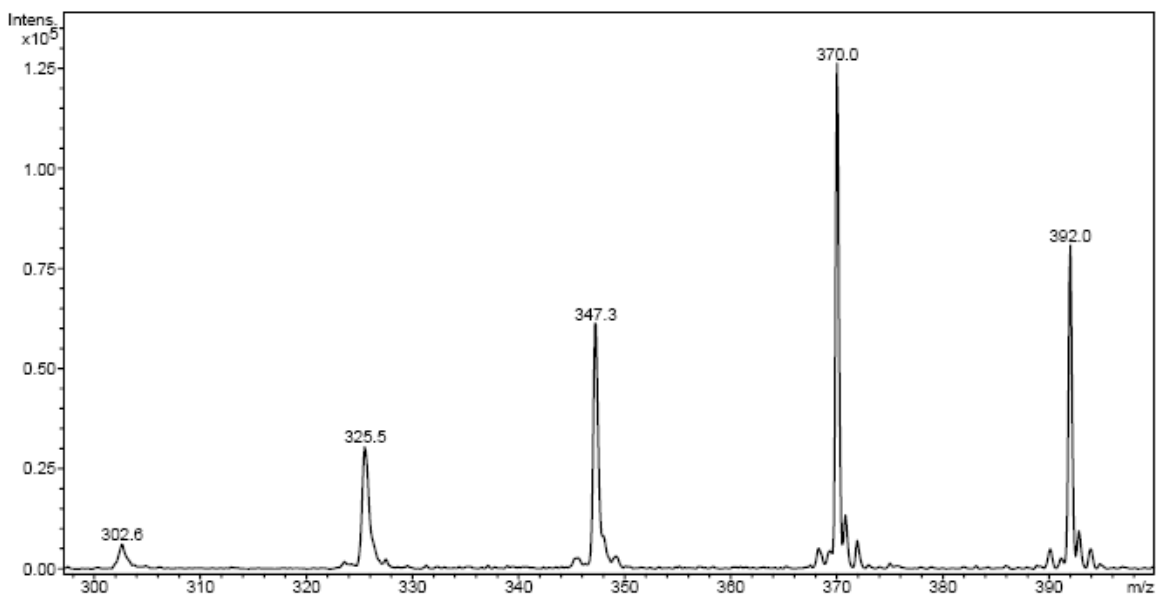

**Figure 3:** MS data on [<sup>18</sup>O<sub>2</sub>, <sup>13</sup>C-carboxyl]-OMP. The target monoanion mass is 370. Decarboxylation and presence of sodium produces peaks at 392, 347, and 325. Mass of 325 is consistent with decarboxylation within the MS to lose <sup>13</sup>CO<sub>2</sub>.
