# Supplementary material for: A substantial oxygen isotope effect at O2 in the OMP decarboxylase reaction: Mechanistic implications
Source: Royal Society of Chemistry journal article supplement (doi:10.1039/b812979g), 2008-01-01
Supplement: b812979g_2.pdf [file b812979g_2.pdf]

## Supporting Information

### **A Substantial Oxygen Isotope Effect at O2 in the OMP Decarboxylase Reaction: Mechanistic Implications**

**Wickliffe O. Wepukhulu, Vanessa L. Smiley, Bhargavi Vemulapalli, Jeffrey A.  
Smiley\*, Linda M. Phillips, and Jeehiun K. Lee\***

|                                                                                                                                                   |    |
|---------------------------------------------------------------------------------------------------------------------------------------------------|----|
| GAS PHASE .....                                                                                                                                   | 2  |
| 6-deprotonated 1-methyl uracil.....                                                                                                               | 2  |
| 1-methyl orotate.....                                                                                                                             | 3  |
| 2-protonated, 6-deprotonated 1-methyl uracil (favored<br>conformer, proton toward N1-methyl).....                                                 | 4  |
| 2-protonated 1-methyl orotate (favored conformer, proton<br>toward N1-methyl).....                                                                | 4  |
| Decarboxylation pathway for 2-protonated 1-methyl orotate<br>r=1.9 (favored conformer, proton toward N1-methyl).....                              | 5  |
| Decarboxylation pathway for 2-protonated 1-methyl orotate<br>r=2.0 (favored conformer, proton toward N1-methyl).....                              | 6  |
| Decarboxylation pathway for 2-protonated 1-methyl orotate<br>r=2.2 (favored conformer, proton toward N1-methyl).....                              | 7  |
| Decarboxylation pathway for 2-protonated 1-methyl orotate<br>r=2.4 (potential energy maximum, favored conformer, proton<br>toward N1-methyl)..... | 8  |
| 4-protonated, 6-deprotonated 1-methyl uracil (favored<br>conformer, proton toward C5).....                                                        | 8  |
| 4-protonated 1-methyl orotate (favored conformer, proton<br>toward C5).....                                                                       | 9  |
| Decarboxylation pathway for 4-protonated 1-methyl orotate<br>r=1.9 (favored conformer, proton toward C5).....                                     | 10 |
| Decarboxylation pathway for 4-protonated 1-methyl orotate<br>r=2.0 (favored conformer, proton toward C5).....                                     | 11 |
| Decarboxylation pathway for 4-protonated 1-methyl orotate<br>r=2.2 (favored conformer, proton toward C5).....                                     | 12 |
| Decarboxylation pathway for 4-protonated 1-methyl orotate<br>r=2.4 (potential energy maximum, favored conformer, proton<br>toward C5).....        | 12 |
| 5-protonated, 6-deprotonated 1-methyl uracil.....                                                                                                 | 13 |
| 5-protonated 1-methyl orotate.....                                                                                                                | 14 |
| Decarboxylation pathway for 5-protonated 1-methyl orotate<br>r=1.8.....                                                                           | 15 |
| Decarboxylation pathway for 5-protonated 1-methyl orotate<br>r=2.0.....                                                                           | 16 |

|                                                                                                    |    |
|----------------------------------------------------------------------------------------------------|----|
| Decarboxylation pathway for 5-protonated 1-methyl orotate<br>r=2.1 (potential energy maximum)..... | 16 |
| Decarboxylation pathway for 5-protonated 1-methyl orotate<br>r=2.2.....                            | 17 |
| Acetamide.....                                                                                     | 18 |
| 1-methyl orotate acetamide complex.....                                                            | 19 |
| ONSAGER.....                                                                                       | 19 |
| 6-deprotonated 1-methyl uracil.....                                                                | 20 |
| 1-methyl orotate.....                                                                              | 20 |
| 2-protonated, 6-deprotonated 1-methyl uracil (favored<br>conformer, proton toward N1-methyl).....  | 21 |
| 2-protonated 1-methyl orotate (favored conformer, proton<br>toward N1-methyl).....                 | 22 |
| 4-protonated, 6-deprotonated 1-methyl uracil (favored<br>conformer, proton toward C5).....         | 23 |
| 4-protonated 1-methyl orotate (favored conformer, proton<br>toward C5).....                        | 23 |
| 5-protonated, 6-deprotonated 1-methyl uracil.....                                                  | 24 |
| 5-protonated 1-methyl orotate.....                                                                 | 25 |
| Decarboxylation pathway for 5-protonated 1-methyl orotate<br>r=2.3 (potential energy maximum)..... | 26 |

## GAS PHASE

### 6-deprotonated 1-methyl uracil

#### B3lyp/6-31+G\*

SCF Done: E(RB+HF-LYP) = -453.556115607

|                                              |             |
|----------------------------------------------|-------------|
| Zero-point correction=                       | 0.100928    |
| (Hartree/Particle)                           |             |
| Thermal correction to Energy=                | 0.108561    |
| Thermal correction to Enthalpy=              | 0.109505    |
| Thermal correction to Gibbs Free Energy=     | 0.068599    |
| Sum of electronic and zero-point Energies=   | -453.455188 |
| Sum of electronic and thermal Energies=      | -453.447555 |
| Sum of electronic and thermal Enthalpies=    | -453.446611 |
| Sum of electronic and thermal Free Energies= | -453.487517 |

|       | E (Thermal) | CV             | S              |
|-------|-------------|----------------|----------------|
|       | KCAL/MOL    | CAL/MOL-KELVIN | CAL/MOL-KELVIN |
| TOTAL | 68.123      | 28.108         | 86.093         |

#### Standard orientation:

| Center<br>Number | Atomic<br>Number | Atomic<br>Type | Coordinates (Angstroms) |           |           |
|------------------|------------------|----------------|-------------------------|-----------|-----------|
|                  |                  |                | X                       | Y         | Z         |
| 1                | 7                | 0              | -1.065176               | -0.511459 | -0.000022 |
| 2                | 6                | 0              | -0.659112               | 0.811289  | -0.000004 |
| 3                | 7                | 0              | 0.709010                | 0.982486  | -0.000028 |

|    |   |   |           |           |           |
|----|---|---|-----------|-----------|-----------|
| 4  | 6 | 0 | 1.694959  | -0.031376 | -0.000002 |
| 5  | 6 | 0 | 1.134015  | -1.351884 | 0.000018  |
| 6  | 6 | 0 | -0.223110 | -1.641347 | 0.000010  |
| 7  | 6 | 0 | -2.513501 | -0.710417 | -0.000010 |
| 8  | 8 | 0 | -1.438685 | 1.779855  | 0.000031  |
| 9  | 1 | 0 | 1.036717  | 1.941104  | -0.000007 |
| 10 | 8 | 0 | 2.891895  | 0.316337  | 0.000000  |
| 11 | 1 | 0 | 1.854142  | -2.167340 | 0.000041  |
| 12 | 1 | 0 | -2.673920 | -1.788684 | -0.000192 |
| 13 | 1 | 0 | -2.974458 | -0.254861 | 0.885886  |
| 14 | 1 | 0 | -2.974509 | -0.254532 | -0.885704 |

## 1-methyl orotate

### B3lyp/6-31+G\*

SCF Done: E(RB+HF-LYP) = -642.206013214

Zero-point correction= 0.116200  
 (Hartree/Particle)  
 Thermal correction to Energy= 0.126895  
 Thermal correction to Enthalpy= 0.127839  
 Thermal correction to Gibbs Free Energy= 0.078210  
 Sum of electronic and zero-point Energies= -642.089813  
 Sum of electronic and thermal Energies= -642.079118  
 Sum of electronic and thermal Enthalpies= -642.078174  
 Sum of electronic and thermal Free Energies= -642.127804

|       | E (Thermal) | CV             | S              |
|-------|-------------|----------------|----------------|
|       | KCAL/MOL    | CAL/MOL-KELVIN | CAL/MOL-KELVIN |
| TOTAL | 79.628      | 37.673         | 104.455        |

Standard orientation:

| Center<br>Number | Atomic<br>Number | Atomic<br>Type | Coordinates (Angstroms) |           |           |
|------------------|------------------|----------------|-------------------------|-----------|-----------|
|                  |                  |                | X                       | Y         | Z         |
| 1                | 7                | 0              | 0.147660                | 0.899634  | -0.052186 |
| 2                | 6                | 0              | -1.205426               | 1.216322  | -0.036533 |
| 3                | 7                | 0              | -2.048004               | 0.123626  | 0.011819  |
| 4                | 6                | 0              | -1.698964               | -1.244390 | 0.042197  |
| 5                | 6                | 0              | -0.280798               | -1.461254 | 0.022875  |
| 6                | 6                | 0              | 0.598145                | -0.413932 | -0.010807 |
| 7                | 6                | 0              | 1.111398                | 2.008551  | -0.088449 |
| 8                | 8                | 0              | -1.643823               | 2.369306  | -0.065618 |
| 9                | 1                | 0              | -3.038128               | 0.339049  | 0.022843  |
| 10               | 8                | 0              | -2.600376               | -2.090368 | 0.079511  |
| 11               | 1                | 0              | 0.087374                | -2.479186 | 0.031198  |
| 12               | 6                | 0              | 2.129909                | -0.623270 | 0.025136  |
| 13               | 8                | 0              | 2.632921                | -1.030153 | -1.045018 |
| 14               | 8                | 0              | 2.647603                | -0.340729 | 1.131544  |
| 15               | 1                | 0              | 1.836522                | 1.828321  | -0.885994 |
| 16               | 1                | 0              | 0.556252                | 2.925620  | -0.278935 |
| 17               | 1                | 0              | 1.644201                | 2.066773  | 0.863597  |

## 2-protonated, 6-deprotonated 1-methyl uracil (favored conformer, proton toward N1-methyl)

### B3lyp/6-31+G\*

SCF Done: E(RB+HF-LYP) = -454.034797905

Zero-point correction= 0.112664  
(Hartree/Particle)  
Thermal correction to Energy= 0.120824  
Thermal correction to Enthalpy= 0.121768  
Thermal correction to Gibbs Free Energy= 0.079944  
Sum of electronic and zero-point Energies= -453.922134  
Sum of electronic and thermal Energies= -453.913974  
Sum of electronic and thermal Enthalpies= -453.913030  
Sum of electronic and thermal Free Energies= -453.954854

|       | E (Thermal)<br>KCAL/MOL | CV<br>CAL/MOL-KELVIN | S<br>CAL/MOL-KELVIN |
|-------|-------------------------|----------------------|---------------------|
| TOTAL | 75.818                  | 30.400               | 88.027              |

Standard orientation:

| Center<br>Number | Atomic<br>Number | Atomic<br>Type | Coordinates (Angstroms) |           |           |
|------------------|------------------|----------------|-------------------------|-----------|-----------|
|                  |                  |                | X                       | Y         | Z         |
| 1                | 7                | 0              | -0.696674               | 0.988815  | -0.000066 |
| 2                | 6                | 0              | -1.740830               | -0.018136 | 0.000051  |
| 3                | 6                | 0              | -1.194935               | -1.349930 | -0.000009 |
| 4                | 6                | 0              | 0.140053                | -1.689499 | -0.000036 |
| 5                | 7                | 0              | 1.026453                | -0.545541 | -0.000049 |
| 6                | 6                | 0              | 0.604605                | 0.713738  | -0.000045 |
| 7                | 1                | 0              | -0.995507               | 1.959534  | 0.000012  |
| 8                | 8                | 0              | -2.898164               | 0.376998  | 0.000049  |
| 9                | 1                | 0              | -1.932437               | -2.147465 | -0.000043 |
| 10               | 8                | 0              | 1.414536                | 1.786198  | -0.000014 |
| 11               | 6                | 0              | 2.469911                | -0.821049 | 0.000050  |
| 12               | 1                | 0              | 2.556367                | -1.907163 | -0.000454 |
| 13               | 1                | 0              | 2.954506                | -0.424071 | -0.901755 |
| 14               | 1                | 0              | 2.954204                | -0.424979 | 0.902405  |
| 15               | 1                | 0              | 2.350602                | 1.524923  | 0.000292  |

## 2-protonated 1-methyl orotate (favored conformer, proton toward N1-methyl)

### B3lyp/6-31+G\*

SCF Done: E(RB+HF-LYP) = -642.647673668

Zero-point correction= 0.127866  
(Hartree/Particle)  
Thermal correction to Energy= 0.138629  
Thermal correction to Enthalpy= 0.139573  
Thermal correction to Gibbs Free Energy= 0.090610  
Sum of electronic and zero-point Energies= -642.519808  
Sum of electronic and thermal Energies= -642.509044  
Sum of electronic and thermal Enthalpies= -642.508100

Sum of electronic and thermal Free Energies= -642.557064

|       | E (Thermal)<br>KCAL/MOL | CV<br>CAL/MOL-KELVIN | S<br>CAL/MOL-KELVIN |
|-------|-------------------------|----------------------|---------------------|
| TOTAL | 86.991                  | 39.564               | 103.053             |

Standard orientation:

| Center<br>Number | Atomic<br>Number | Atomic<br>Type | Coordinates (Angstroms) |           |           |
|------------------|------------------|----------------|-------------------------|-----------|-----------|
|                  |                  |                | X                       | Y         | Z         |
| 1                | 7                | 0              | -2.038868               | -0.050632 | 0.046982  |
| 2                | 6                | 0              | -1.560300               | -1.417204 | 0.082816  |
| 3                | 6                | 0              | -0.123840               | -1.480973 | 0.012912  |
| 4                | 6                | 0              | 0.669328                | -0.376992 | -0.029401 |
| 5                | 7                | 0              | 0.072438                | 0.915560  | -0.043597 |
| 6                | 6                | 0              | -1.256167               | 1.021607  | -0.037516 |
| 7                | 1                | 0              | -3.047143               | 0.081552  | 0.053987  |
| 8                | 8                | 0              | -2.382601               | -2.309440 | 0.152937  |
| 9                | 1                | 0              | 0.348716                | -2.455073 | -0.017981 |
| 10               | 8                | 0              | -1.892375               | 2.185444  | -0.123654 |
| 11               | 6                | 0              | 2.233488                | -0.522162 | 0.020283  |
| 12               | 8                | 0              | 2.780088                | 0.295848  | 0.798005  |
| 13               | 8                | 0              | 2.662410                | -1.444156 | -0.681362 |
| 14               | 6                | 0              | 0.887705                | 2.151953  | -0.147781 |
| 15               | 1                | 0              | 1.918980                | 1.859504  | 0.068258  |
| 16               | 1                | 0              | 0.795436                | 2.579223  | -1.151844 |
| 17               | 1                | 0              | 0.582956                | 2.864689  | 0.626222  |
| 18               | 1                | 0              | -1.275401               | 2.936667  | -0.177613 |

**Decarboxylation pathway for 2-protonated 1-methyl  
 orotate r=1.9 (favored conformer, proton toward N1-  
 methyl)**

**B3lyp/6-31+G\***

SCF Done: E(RB+HF-LYP) = -642.638974945

|                                              |             |
|----------------------------------------------|-------------|
| Zero-point correction=                       | 0.126398    |
| (Hartree/Particle)                           |             |
| Thermal correction to Energy=                | 0.136901    |
| Thermal correction to Enthalpy=              | 0.137845    |
| Thermal correction to Gibbs Free Energy=     | 0.089411    |
| Sum of electronic and zero-point Energies=   | -642.512577 |
| Sum of electronic and thermal Energies=      | -642.502074 |
| Sum of electronic and thermal Enthalpies=    | -642.501130 |
| Sum of electronic and thermal Free Energies= | -642.549564 |

|       | E (Thermal)<br>KCal/Mol | CV<br>Cal/Mol-Kelvin | S<br>Cal/Mol-Kelvin |
|-------|-------------------------|----------------------|---------------------|
| Total | 85.906                  | 38.702               | 101.938             |

Standard orientation:

| Center<br>Number | Atomic<br>Number | Atomic<br>Type | Coordinates (Angstroms) |   |   |
|------------------|------------------|----------------|-------------------------|---|---|
|                  |                  |                | X                       | Y | Z |

|    |   |   |           |           |           |
|----|---|---|-----------|-----------|-----------|
| 1  | 7 | 0 | 2.098377  | -0.184629 | -0.000232 |
| 2  | 6 | 0 | 1.504294  | -1.507113 | -0.000022 |
| 3  | 6 | 0 | 0.062700  | -1.442208 | -0.000083 |
| 4  | 6 | 0 | -0.637428 | -0.278925 | 0.000088  |
| 5  | 7 | 0 | 0.074772  | 0.948228  | 0.000211  |
| 6  | 6 | 0 | 1.407984  | 0.952611  | -0.000125 |
| 7  | 1 | 0 | 3.114179  | -0.139496 | -0.000461 |
| 8  | 8 | 0 | 2.252341  | -2.465849 | 0.000173  |
| 9  | 1 | 0 | -0.494213 | -2.372897 | -0.000161 |
| 10 | 8 | 0 | 2.135417  | 2.068111  | -0.000226 |
| 11 | 6 | 0 | -2.532136 | -0.420626 | -0.000158 |
| 12 | 8 | 0 | -3.076005 | 0.676559  | -0.000764 |
| 13 | 8 | 0 | -2.789969 | -1.603227 | 0.000374  |
| 14 | 6 | 0 | -0.647713 | 2.242190  | 0.000757  |
| 15 | 1 | 0 | -1.715562 | 1.999833  | 0.000789  |
| 16 | 1 | 0 | -0.405821 | 2.811052  | 0.905915  |
| 17 | 1 | 0 | -0.406377 | 2.811576  | -0.904256 |
| 18 | 1 | 0 | 1.575276  | 2.864418  | -0.000865 |

**Decarboxylation pathway for 2-protonated 1-methyl  
 orotate r=2.0 (favored conformer, proton toward N1-  
 methyl)**

**B3lyp/6-31+G\***

SCF Done: E(RB+HF-LYP) = -642.635966555

Zero-point correction= 0.126214  
 (Hartree/Particle)  
 Thermal correction to Energy= 0.136847  
 Thermal correction to Enthalpy= 0.137791  
 Thermal correction to Gibbs Free Energy= 0.089114  
 Sum of electronic and zero-point Energies= -642.509752  
 Sum of electronic and thermal Energies= -642.499120  
 Sum of electronic and thermal Enthalpies= -642.498176  
 Sum of electronic and thermal Free Energies= -642.546852

|       | E (Thermal) | CV             | S              |
|-------|-------------|----------------|----------------|
|       | KCal/Mol    | Cal/Mol-Kelvin | Cal/Mol-Kelvin |
| Total | 85.873      | 38.979         | 102.448        |

Standard orientation:

| Center<br>Number | Atomic<br>Number | Atomic<br>Type | Coordinates (Angstroms) |           |          |
|------------------|------------------|----------------|-------------------------|-----------|----------|
|                  |                  |                | X                       | Y         | Z        |
| 1                | 7                | 0              | -2.115925               | -0.206992 | 0.000058 |
| 2                | 6                | 0              | -1.503266               | -1.522248 | 0.000058 |
| 3                | 6                | 0              | -0.062919               | -1.436834 | 0.000058 |
| 4                | 6                | 0              | 0.626056                | -0.264915 | 0.000058 |
| 5                | 7                | 0              | -0.108562               | 0.949160  | 0.000058 |
| 6                | 6                | 0              | -1.441481               | 0.939576  | 0.000058 |
| 7                | 1                | 0              | -3.132151               | -0.176608 | 0.000058 |
| 8                | 8                | 0              | -2.240743               | -2.490035 | 0.000058 |
| 9                | 1                | 0              | 0.500296                | -2.364059 | 0.000012 |

|    |   |   |           |           |           |
|----|---|---|-----------|-----------|-----------|
| 10 | 8 | 0 | -2.184281 | 2.046635  | 0.000058  |
| 11 | 6 | 0 | 2.621518  | -0.399570 | 0.000058  |
| 12 | 8 | 0 | 3.121741  | 0.708588  | -0.000693 |
| 13 | 8 | 0 | 2.850108  | -1.581009 | 0.000157  |
| 14 | 6 | 0 | 0.604753  | 2.246245  | 0.000058  |
| 15 | 1 | 0 | 1.673472  | 2.015864  | 0.000188  |
| 16 | 1 | 0 | 0.361180  | 2.816257  | -0.904181 |
| 17 | 1 | 0 | 0.361042  | 2.816332  | 0.904211  |
| 18 | 1 | 0 | -1.635003 | 2.850077  | 0.000204  |

**Decarboxylation pathway for 2-protonated 1-methyl  
 orotate r=2.2 (favored conformer, proton toward N1-  
 methyl)**

**B3lyp/6-31+G\***

SCF Done: E(RB+HF-LYP) = -642.632035651

Zero-point correction= 0.125781  
 (Hartree/Particle)  
 Thermal correction to Energy= 0.136713  
 Thermal correction to Enthalpy= 0.137657  
 Thermal correction to Gibbs Free Energy= 0.088140  
 Sum of electronic and zero-point Energies= -642.506255  
 Sum of electronic and thermal Energies= -642.495322  
 Sum of electronic and thermal Enthalpies= -642.494378  
 Sum of electronic and thermal Free Energies= -642.543896

|       | E (Thermal)<br>KCal/Mol | CV<br>Cal/Mol-Kelvin | S<br>Cal/Mol-Kelvin |
|-------|-------------------------|----------------------|---------------------|
| Total | 85.789                  | 39.511               | 104.219             |

Standard orientation:

| Center<br>Number | Atomic<br>Number | Atomic<br>Type | Coordinates (Angstroms) |           |           |
|------------------|------------------|----------------|-------------------------|-----------|-----------|
|                  |                  |                | X                       | Y         | Z         |
| 1                | 7                | 0              | -2.151509               | -0.248277 | 0.000068  |
| 2                | 6                | 0              | -1.504658               | -1.547864 | 0.000068  |
| 3                | 6                | 0              | -0.067593               | -1.425549 | 0.000068  |
| 4                | 6                | 0              | 0.607988                | -0.240614 | 0.000068  |
| 5                | 7                | 0              | -0.173937               | 0.950535  | 0.000068  |
| 6                | 6                | 0              | -1.504976               | 0.914047  | 0.000068  |
| 7                | 1                | 0              | -3.167876               | -0.244164 | 0.000068  |
| 8                | 8                | 0              | -2.221250               | -2.533214 | 0.000068  |
| 9                | 1                | 0              | 0.504002                | -2.348246 | 0.000133  |
| 10               | 8                | 0              | -2.277851               | 2.004051  | 0.000068  |
| 11               | 6                | 0              | 2.804712                | -0.360634 | -0.000178 |
| 12               | 8                | 0              | 3.214951                | 0.766982  | -0.000909 |
| 13               | 8                | 0              | 2.966957                | -1.539927 | 0.000481  |
| 14               | 6                | 0              | 0.515975                | 2.256258  | 0.000068  |
| 15               | 1                | 0              | 1.585875                | 2.045273  | -0.000184 |
| 16               | 1                | 0              | 0.266800                | 2.827055  | -0.902828 |
| 17               | 1                | 0              | 0.267145                | 2.826873  | 0.903172  |
| 18               | 1                | 0              | -1.748971               | 2.820391  | 0.000068  |

**Decarboxylation pathway for 2-protonated 1-methyl  
orotate r=2.4 (potential energy maximum, favored  
conformer, proton toward N1-methyl)**

**B3lyp/6-31+G\***

SCF Done: E(RB+HF-LYP) = -642.630703954

Zero-point correction= 0.125296  
(Hartree/Particle)  
Thermal correction to Energy= 0.136566  
Thermal correction to Enthalpy= 0.137510  
Thermal correction to Gibbs Free Energy= 0.086775  
Sum of electronic and zero-point Energies= -642.505408  
Sum of electronic and thermal Energies= -642.494138  
Sum of electronic and thermal Enthalpies= -642.493194  
Sum of electronic and thermal Free Energies= -642.543929

|       | E (Thermal)<br>KCal/Mol | CV<br>Cal/Mol-Kelvin | S<br>Cal/Mol-Kelvin |
|-------|-------------------------|----------------------|---------------------|
| Total | 85.696                  | 39.993               | 106.781             |

Standard orientation:

| Center<br>Number | Atomic<br>Number | Atomic<br>Type | Coordinates (Angstroms) |           |           |
|------------------|------------------|----------------|-------------------------|-----------|-----------|
|                  |                  |                | X                       | Y         | Z         |
| 1                | 7                | 0              | -2.195223               | -0.288035 | 0.000002  |
| 2                | 6                | 0              | -1.516956               | -1.570952 | -0.000005 |
| 3                | 6                | 0              | -0.084123               | -1.414415 | -0.000007 |
| 4                | 6                | 0              | 0.584199                | -0.218636 | -0.000002 |
| 5                | 7                | 0              | -0.245573               | 0.950889  | 0.000006  |
| 6                | 6                | 0              | -1.574109               | 0.888089  | 0.000007  |
| 7                | 1                | 0              | -3.211111               | -0.307658 | 0.000004  |
| 8                | 8                | 0              | -2.212788               | -2.573329 | -0.000009 |
| 9                | 1                | 0              | 0.494838                | -2.333053 | -0.000013 |
| 10               | 8                | 0              | -2.375633               | 1.961085  | 0.000014  |
| 11               | 6                | 0              | 3.026038                | -0.323521 | -0.000007 |
| 12               | 8                | 0              | 3.327729                | 0.822756  | -0.000002 |
| 13               | 8                | 0              | 3.105127                | -1.499275 | -0.000014 |
| 14               | 6                | 0              | 0.415900                | 2.267963  | 0.000011  |
| 15               | 1                | 0              | 1.487849                | 2.075395  | 0.000009  |
| 16               | 1                | 0              | 0.159418                | 2.837615  | -0.902199 |
| 17               | 1                | 0              | 0.159420                | 2.837606  | 0.902228  |
| 18               | 1                | 0              | -1.866014               | 2.789061  | 0.000018  |

**4-protonated, 6-deprotonated 1-methyl uracil  
(favored conformer, proton toward C5)**

**B3lyp/6-31+G\***

Done: E(RB+HF-LYP) = -454.061592225

Zero-point correction= 0.113774  
(Hartree/Particle)  
Thermal correction to Energy= 0.121662



Thermal correction to Enthalpy= 0.122606  
 Thermal correction to Gibbs Free Energy= 0.081423  
 Sum of electronic and zero-point Energies= -453.947819  
 Sum of electronic and thermal Energies= -453.939930  
 Sum of electronic and thermal Enthalpies= -453.938986  
 Sum of electronic and thermal Free Energies= -453.980169

|       | E (Thermal)<br>KCAL/MOL | CV<br>CAL/MOL-KELVIN | S<br>CAL/MOL-KELVIN |
|-------|-------------------------|----------------------|---------------------|
| TOTAL | 76.344                  | 29.768               | 86.676              |

Standard orientation:

| Center<br>Number | Atomic<br>Number | Atomic<br>Type | Coordinates (Angstroms) |           |           |
|------------------|------------------|----------------|-------------------------|-----------|-----------|
|                  |                  |                | X                       | Y         | Z         |
| 1                | 7                | 0              | 0.682499                | 0.981171  | 0.000057  |
| 2                | 6                | 0              | 1.560278                | -0.057160 | 0.000013  |
| 3                | 6                | 0              | 1.088536                | -1.345262 | -0.000115 |
| 4                | 6                | 0              | -0.305705               | -1.630073 | -0.000091 |
| 5                | 7                | 0              | -1.109319               | -0.521344 | -0.000014 |
| 6                | 6                | 0              | -0.702808               | 0.821635  | -0.000014 |
| 7                | 1                | 0              | 1.022745                | 1.936828  | 0.000083  |
| 8                | 8                | 0              | 2.844630                | 0.356788  | 0.000085  |
| 9                | 1                | 0              | 1.795637                | -2.171505 | -0.000159 |
| 10               | 8                | 0              | -1.456085               | 1.782965  | -0.000142 |
| 11               | 6                | 0              | -2.573733               | -0.698469 | 0.000156  |
| 12               | 1                | 0              | -2.754601               | -1.771477 | 0.000116  |
| 13               | 1                | 0              | -3.009578               | -0.230182 | 0.887369  |
| 14               | 1                | 0              | -3.009906               | -0.230251 | -0.887004 |
| 15               | 1                | 0              | 3.435681                | -0.414253 | 0.000053  |

#### 4-protonated 1-methyl orotate (favored conformer, proton toward C5)

**B3lyp/6-31+G\***

SCF Done: E(RB+HF-LYP) = -642.672852399

Zero-point correction= 0.128154  
 (Hartree/Particle)  
 Thermal correction to Energy= 0.139393  
 Thermal correction to Enthalpy= 0.140337  
 Thermal correction to Gibbs Free Energy= 0.088829  
 Sum of electronic and zero-point Energies= -642.544699  
 Sum of electronic and thermal Energies= -642.533460  
 Sum of electronic and thermal Enthalpies= -642.532516  
 Sum of electronic and thermal Free Energies= -642.584023

|       | E (Thermal)<br>KCAL/MOL | CV<br>CAL/MOL-KELVIN | S<br>CAL/MOL-KELVIN |
|-------|-------------------------|----------------------|---------------------|
| TOTAL | 87.470                  | 39.657               | 108.406             |

Standard orientation:

| Center | Atomic | Atomic | Coordinates (Angstroms) |  |  |
|--------|--------|--------|-------------------------|--|--|
|--------|--------|--------|-------------------------|--|--|

| Number | Number | Type | X         | Y         | Z         |
|--------|--------|------|-----------|-----------|-----------|
| 1      | 7      | 0    | 2.013170  | 0.237167  | -0.000900 |
| 2      | 6      | 0    | 1.653506  | -1.073363 | 0.003799  |
| 3      | 6      | 0    | 0.323999  | -1.413914 | 0.002345  |
| 4      | 6      | 0    | -0.626499 | -0.381223 | -0.003625 |
| 5      | 7      | 0    | -0.233119 | 0.919015  | -0.012416 |
| 6      | 6      | 0    | 1.115295  | 1.309653  | -0.005026 |
| 7      | 1      | 0    | 2.996554  | 0.489989  | 0.003381  |
| 8      | 8      | 0    | 2.703444  | -1.901817 | 0.009344  |
| 9      | 1      | 0    | -0.006496 | -2.445654 | 0.004736  |
| 10     | 8      | 0    | 1.505392  | 2.459801  | -0.003558 |
| 11     | 6      | 0    | -1.253442 | 1.992903  | -0.012106 |
| 12     | 1      | 0    | -0.739811 | 2.946114  | -0.113046 |
| 13     | 1      | 0    | -1.932632 | 1.824896  | -0.849684 |
| 14     | 1      | 0    | -1.810323 | 1.949327  | 0.926204  |
| 15     | 1      | 0    | 2.411613  | -2.829394 | 0.013434  |
| 16     | 6      | 0    | -2.129266 | -0.702540 | 0.003909  |
| 17     | 8      | 0    | -2.597286 | -0.846406 | -1.138862 |
| 18     | 8      | 0    | -2.596652 | -0.763785 | 1.154626  |

**Decarboxylation pathway for 4-protonated 1-methyl  
 orotate r=1.9 (favored conformer, proton toward C5)**

**B3lyp/6-31+G\***

SCF Done: E(RB+HF-LYP) = -642.662469073

Zero-point correction= 0.127189  
 (Hartree/Particle)  
 Thermal correction to Energy= 0.137669  
 Thermal correction to Enthalpy= 0.138613  
 Thermal correction to Gibbs Free Energy= 0.089949  
 Sum of electronic and zero-point Energies= -642.535280  
 Sum of electronic and thermal Energies= -642.524800  
 Sum of electronic and thermal Enthalpies= -642.523856  
 Sum of electronic and thermal Free Energies= -642.572520

|       | E (Thermal)<br>KCal/Mol | CV<br>Cal/Mol-Kelvin | S<br>Cal/Mol-Kelvin |
|-------|-------------------------|----------------------|---------------------|
| Total | 86.389                  | 38.392               | 102.421             |

Standard orientation:

| Center<br>Number | Atomic<br>Number | Atomic<br>Type | Coordinates (Angstroms) |           |           |
|------------------|------------------|----------------|-------------------------|-----------|-----------|
|                  |                  |                | X                       | Y         | Z         |
| 1                | 7                | 0              | -2.094397               | -0.014485 | -0.000318 |
| 2                | 6                | 0              | -1.522062               | -1.244433 | 0.000253  |
| 3                | 6                | 0              | -0.151053               | -1.353799 | 0.000480  |
| 4                | 6                | 0              | 0.627453                | -0.192428 | 0.000572  |
| 5                | 7                | 0              | 0.020918                | 1.016056  | 0.000306  |
| 6                | 6                | 0              | -1.379164               | 1.186417  | -0.000359 |
| 7                | 1                | 0              | -3.106189               | 0.074377  | -0.000386 |
| 8                | 8                | 0              | -2.416854               | -2.239235 | 0.000367  |

|    |   |   |           |           |           |
|----|---|---|-----------|-----------|-----------|
| 9  | 1 | 0 | 0.368083  | -2.306792 | 0.000210  |
| 10 | 8 | 0 | -1.937728 | 2.265227  | -0.000913 |
| 11 | 6 | 0 | 0.788806  | 2.284421  | 0.000693  |
| 12 | 1 | 0 | 0.519113  | 2.860585  | -0.887318 |
| 13 | 1 | 0 | 0.517868  | 2.860680  | 0.888232  |
| 14 | 1 | 0 | 1.845445  | 2.025215  | 0.001348  |
| 15 | 1 | 0 | -1.964047 | -3.100249 | 0.000553  |
| 16 | 6 | 0 | 2.493052  | -0.552344 | -0.000223 |
| 17 | 8 | 0 | 2.592749  | -1.764428 | -0.001098 |
| 18 | 8 | 0 | 3.160820  | 0.464457  | 0.000263  |

**Decarboxylation pathway for 4-protonated 1-methyl  
 orotate r=2.0 (favored conformer, proton toward C5)**

**B3lyp/6-31+G\***

SCF Done: E(RB+HF-LYP) = -642.660186849

Zero-point correction= 0.127025  
 (Hartree/Particle)  
 Thermal correction to Energy= 0.137599  
 Thermal correction to Enthalpy= 0.138543  
 Thermal correction to Gibbs Free Energy= 0.089836  
 Sum of electronic and zero-point Energies= -642.533162  
 Sum of electronic and thermal Energies= -642.522588  
 Sum of electronic and thermal Enthalpies= -642.521643  
 Sum of electronic and thermal Free Energies= -642.570351

|       | E (Thermal) | CV             | S              |
|-------|-------------|----------------|----------------|
|       | KCal/Mol    | Cal/Mol-Kelvin | Cal/Mol-Kelvin |
| Total | 86.345      | 38.624         | 102.513        |

Standard orientation:

| Center<br>Number | Atomic<br>Number | Atomic<br>Type | Coordinates (Angstroms) |           |           |
|------------------|------------------|----------------|-------------------------|-----------|-----------|
|                  |                  |                | X                       | Y         | Z         |
| 1                | 7                | 0              | 2.112703                | -0.052030 | 0.000151  |
| 2                | 6                | 0              | 1.511965                | -1.269224 | -0.000179 |
| 3                | 6                | 0              | 0.139062                | -1.347755 | -0.000415 |
| 4                | 6                | 0              | -0.617669               | -0.169679 | -0.000492 |
| 5                | 7                | 0              | 0.022698                | 1.021764  | -0.000286 |
| 6                | 6                | 0              | 1.424791                | 1.164496  | 0.000215  |
| 7                | 1                | 0              | 3.126133                | 0.013170  | 0.000369  |
| 8                | 8                | 0              | 2.386942                | -2.283370 | -0.000161 |
| 9                | 1                | 0              | -0.392932               | -2.293951 | -0.000443 |
| 10               | 8                | 0              | 2.007217                | 2.231441  | 0.000729  |
| 11               | 6                | 0              | -0.723578               | 2.301256  | -0.000495 |
| 12               | 1                | 0              | -0.448654               | 2.875068  | 0.887660  |
| 13               | 1                | 0              | -0.446759               | 2.875815  | -0.887553 |
| 14               | 1                | 0              | -1.784258               | 2.059904  | -0.001558 |
| 15               | 1                | 0              | 1.915365                | -3.134053 | -0.000300 |
| 16               | 6                | 0              | -2.586303               | -0.522494 | 0.000177  |
| 17               | 8                | 0              | -2.663700               | -1.728307 | 0.000798  |
| 18               | 8                | 0              | -3.206248               | 0.514775  | -0.000128 |

## Decarboxylation pathway for 4-protonated 1-methyl orotate r=2.2 (favored conformer, proton toward C5)

### B3lyp/6-31+G\*

SCF Done: E(RB+HF-LYP) = -642.657366667

Zero-point correction= 0.126644  
(Hartree/Particle)  
Thermal correction to Energy= 0.137450  
Thermal correction to Enthalpy= 0.138394  
Thermal correction to Gibbs Free Energy= 0.089065  
Sum of electronic and zero-point Energies= -642.530723  
Sum of electronic and thermal Energies= -642.519917  
Sum of electronic and thermal Enthalpies= -642.518973  
Sum of electronic and thermal Free Energies= -642.568301

|       | E (Thermal)<br>KCal/Mol | CV<br>Cal/Mol-Kelvin | S<br>Cal/Mol-Kelvin |
|-------|-------------------------|----------------------|---------------------|
| Total | 86.251                  | 39.061               | 103.821             |

Standard orientation:

| Center<br>Number | Atomic<br>Number | Atomic<br>Type | Coordinates (Angstroms) |           |           |
|------------------|------------------|----------------|-------------------------|-----------|-----------|
|                  |                  |                | X                       | Y         | Z         |
| 1                | 7                | 0              | -2.148322               | -0.118849 | -0.000230 |
| 2                | 6                | 0              | -1.497707               | -1.311252 | -0.000045 |
| 3                | 6                | 0              | -0.123498               | -1.334790 | -0.000106 |
| 4                | 6                | 0              | 0.600141                | -0.129386 | -0.000128 |
| 5                | 7                | 0              | -0.104033               | 1.029707  | -0.000201 |
| 6                | 6                | 0              | -1.508195               | 1.122591  | -0.000732 |
| 7                | 1                | 0              | -3.163238               | -0.094751 | -0.000044 |
| 8                | 8                | 0              | -2.336016               | -2.359567 | 0.000161  |
| 9                | 1                | 0              | 0.429073                | -2.269743 | 0.000033  |
| 10               | 8                | 0              | -2.132730               | 2.167324  | 0.000178  |
| 11               | 6                | 0              | 0.595749                | 2.332586  | 0.000208  |
| 12               | 1                | 0              | 0.306652                | 2.901324  | -0.887170 |
| 13               | 1                | 0              | 0.305826                | 2.901260  | 0.887357  |
| 14               | 1                | 0              | 1.663748                | 2.127252  | 0.000693  |
| 15               | 1                | 0              | -1.830755               | -3.190308 | 0.000245  |
| 16               | 6                | 0              | 2.773720                | -0.469319 | 0.000098  |
| 17               | 8                | 0              | 2.798636                | -1.663558 | 0.000214  |
| 18               | 8                | 0              | 3.296850                | 0.604097  | 0.000215  |

## Decarboxylation pathway for 4-protonated 1-methyl orotate r=2.4 (potential energy maximum, favored conformer, proton toward C5)

### B3lyp/6-31+G\*

SCF Done: E(RB+HF-LYP) = -642.656703781

Zero-point correction= 0.126330  
(Hartree/Particle)  
Thermal correction to Energy= 0.137345

Thermal correction to Enthalpy= 0.138289  
 Thermal correction to Gibbs Free Energy= 0.088195  
 Sum of electronic and zero-point Energies= -642.530374  
 Sum of electronic and thermal Energies= -642.519359  
 Sum of electronic and thermal Enthalpies= -642.518415  
 Sum of electronic and thermal Free Energies= -642.568509

|       | E (Thermal)<br>KCAL/MOL | CV<br>CAL/MOL-KELVIN | S<br>CAL/MOL-KELVIN |
|-------|-------------------------|----------------------|---------------------|
| TOTAL | 86.185                  | 39.371               | 105.432             |

Standard orientation:

| Center<br>Number | Atomic<br>Number | Atomic<br>Type | Coordinates (Angstroms) |           |           |
|------------------|------------------|----------------|-------------------------|-----------|-----------|
|                  |                  |                | X                       | Y         | Z         |
| 1                | 7                | 0              | -2.177956               | -0.173401 | 0.000000  |
| 2                | 6                | 0              | -1.487445               | -1.343671 | 0.000053  |
| 3                | 6                | 0              | -0.113856               | -1.321801 | 0.000188  |
| 4                | 6                | 0              | 0.583466                | -0.094941 | 0.000242  |
| 5                | 7                | 0              | -0.172327               | 1.036128  | 0.000126  |
| 6                | 6                | 0              | -1.576961               | 1.086748  | 0.000001  |
| 7                | 1                | 0              | -3.192878               | -0.182347 | -0.000078 |
| 8                | 8                | 0              | -2.293876               | -2.419472 | -0.000041 |
| 9                | 1                | 0              | 0.457455                | -2.245902 | 0.000192  |
| 10               | 8                | 0              | -2.236025               | 2.111661  | -0.000090 |
| 11               | 6                | 0              | 0.483279                | 2.360257  | 0.000033  |
| 12               | 1                | 0              | 0.179201                | 2.922230  | 0.887090  |
| 13               | 1                | 0              | 1.557042                | 2.187470  | -0.000061 |
| 14               | 1                | 0              | 0.179017                | 2.922211  | -0.886969 |
| 15               | 1                | 0              | -1.761058               | -3.232553 | 0.000032  |
| 16               | 6                | 0              | 2.938405                | -0.426512 | -0.000110 |
| 17               | 8                | 0              | 3.379017                | 0.672394  | -0.000332 |
| 18               | 8                | 0              | 2.909870                | -1.610918 | 0.000022  |

## 5-protonated, 6-deprotonated 1-methyl uracil

### B3lyp/6-31+G\*

SCF Done: E(RB+HF-LYP) = -454.073288246

Zero-point correction= 0.113069  
 (Hartree/Particle)  
 Thermal correction to Energy= 0.121182  
 Thermal correction to Enthalpy= 0.122126  
 Thermal correction to Gibbs Free Energy= 0.079661  
 Sum of electronic and zero-point Energies= -453.960219  
 Sum of electronic and thermal Energies= -453.952106  
 Sum of electronic and thermal Enthalpies= -453.951162  
 Sum of electronic and thermal Free Energies= -453.993627

|       | E (Thermal)<br>KCAL/MOL | CV<br>CAL/MOL-KELVIN | S<br>CAL/MOL-KELVIN |
|-------|-------------------------|----------------------|---------------------|
| TOTAL | 76.043                  | 29.384               | 89.375              |

Standard orientation:

| Center<br>Number | Atomic<br>Number | Atomic<br>Type | Coordinates (Angstroms) |           |           |
|------------------|------------------|----------------|-------------------------|-----------|-----------|
|                  |                  |                | X                       | Y         | Z         |
| 1                | 7                | 0              | 0.713899                | 1.033691  | -0.000042 |
| 2                | 6                | 0              | 1.699550                | 0.046812  | -0.000272 |
| 3                | 6                | 0              | 1.147211                | -1.363358 | 0.000178  |
| 4                | 6                | 0              | -0.332478               | -1.617800 | -0.000082 |
| 5                | 7                | 0              | -1.093739               | -0.528270 | -0.000162 |
| 6                | 6                | 0              | -0.655101               | 0.847240  | -0.000212 |
| 7                | 1                | 0              | 1.023588                | 2.002292  | 0.000168  |
| 8                | 8                | 0              | 2.878740                | 0.342923  | -0.000082 |
| 9                | 1                | 0              | 1.573832                | -1.900608 | -0.859612 |
| 10               | 8                | 0              | -1.441501               | 1.770709  | 0.000558  |
| 11               | 6                | 0              | -2.568729               | -0.668182 | -0.000162 |
| 12               | 1                | 0              | 1.573182                | -1.899788 | 0.860818  |
| 13               | 1                | 0              | -2.989410               | -0.190112 | -0.887982 |
| 14               | 1                | 0              | -2.773538               | -1.736782 | -0.000252 |
| 15               | 1                | 0              | -2.989400               | -0.190282 | 0.887748  |

## 5-protonated 1-methyl orotate

### B3lyp/6-31+G\*

SCF Done: E(RB+HF-LYP) = -642.678296565

Zero-point correction= 0.127790  
 (Hartree/Particle)  
 Thermal correction to Energy= 0.138995  
 Thermal correction to Enthalpy= 0.139939  
 Thermal correction to Gibbs Free Energy= 0.089175  
 Sum of electronic and zero-point Energies= -642.550506  
 Sum of electronic and thermal Energies= -642.539301  
 Sum of electronic and thermal Enthalpies= -642.538357  
 Sum of electronic and thermal Free Energies= -642.589121

|       | E (Thermal)<br>KCAL/MOL | CV<br>CAL/MOL-KELVIN | S<br>CAL/MOL-KELVIN |
|-------|-------------------------|----------------------|---------------------|
| TOTAL | 87.221                  | 39.122               | 106.843             |

Standard orientation:

| Center<br>Number | Atomic<br>Number | Atomic<br>Type | Coordinates (Angstroms) |           |           |
|------------------|------------------|----------------|-------------------------|-----------|-----------|
|                  |                  |                | X                       | Y         | Z         |
| 1                | 7                | 0              | -2.053520               | 0.183980  | 0.039179  |
| 2                | 6                | 0              | -1.756689               | -1.175540 | -0.058451 |
| 3                | 6                | 0              | -0.290039               | -1.483729 | -0.259101 |
| 4                | 6                | 0              | 0.656941                | -0.336019 | -0.137641 |
| 5                | 7                | 0              | 0.214910                | 0.913901  | -0.109461 |
| 6                | 6                | 0              | -1.177330               | 1.252040  | 0.018009  |
| 7                | 1                | 0              | -3.032460               | 0.432839  | 0.158339  |
| 8                | 8                | 0              | -2.626918               | -2.016271 | -0.002911 |
| 9                | 8                | 0              | -1.536861               | 2.403550  | 0.100859  |
| 10               | 6                | 0              | 2.134131                | -0.646298 | 0.052329  |
| 11               | 8                | 0              | 2.176501                | -0.862088 | 1.290679  |

|    |   |   |           |           |           |
|----|---|---|-----------|-----------|-----------|
| 12 | 8 | 0 | 2.937651  | -0.644217 | -0.875321 |
| 13 | 6 | 0 | 1.154909  | 2.061012  | -0.073561 |
| 14 | 1 | 0 | 0.012402  | -2.272479 | 0.437359  |
| 15 | 1 | 0 | -0.164888 | -1.914359 | -1.265281 |
| 16 | 1 | 0 | 0.711129  | 2.887442  | -0.625801 |
| 17 | 1 | 0 | 1.319489  | 2.359232  | 0.964609  |
| 18 | 1 | 0 | 2.090079  | 1.745562  | -0.533241 |

## Decarboxylation pathway for 5-protonated 1-methyl orotate r=1.8

### B3lyp/6-31+G\*

SCF Done: E(RB+HF-LYP) = -642.667631972

Zero-point correction= 0.126217  
 (Hartree/Particle)  
 Thermal correction to Energy= 0.137105  
 Thermal correction to Enthalpy= 0.138049  
 Thermal correction to Gibbs Free Energy= 0.088004  
 Sum of electronic and zero-point Energies= -642.541415  
 Sum of electronic and thermal Energies= -642.530527  
 Sum of electronic and thermal Enthalpies= -642.529583  
 Sum of electronic and thermal Free Energies= -642.579628

|       | E (Thermal) | CV             | S              |
|-------|-------------|----------------|----------------|
|       | KCal/Mol    | Cal/Mol-Kelvin | Cal/Mol-Kelvin |
| Total | 86.035      | 38.152         | 105.328        |

Standard orientation:

| Center<br>Number | Atomic<br>Number | Atomic<br>Type | Coordinates (Angstroms) |           |           |
|------------------|------------------|----------------|-------------------------|-----------|-----------|
|                  |                  |                | X                       | Y         | Z         |
| 1                | 7                | 0              | -2.124135               | 0.097774  | 0.051071  |
| 2                | 6                | 0              | -1.757792               | -1.244600 | -0.087698 |
| 3                | 6                | 0              | -0.268164               | -1.471616 | -0.215212 |
| 4                | 6                | 0              | 0.621419                | -0.281321 | -0.166345 |
| 5                | 7                | 0              | 0.117541                | 0.926817  | -0.068984 |
| 6                | 6                | 0              | -1.302105               | 1.204187  | 0.068360  |
| 7                | 1                | 0              | -3.117492               | 0.294495  | 0.148523  |
| 8                | 8                | 0              | -2.593174               | -2.121660 | -0.102279 |
| 9                | 8                | 0              | -1.705268               | 2.336447  | 0.188500  |
| 10               | 6                | 0              | 2.380489                | -0.592537 | 0.054604  |
| 11               | 8                | 0              | 2.434207                | -1.078768 | 1.177840  |
| 12               | 8                | 0              | 3.074418                | -0.264969 | -0.886923 |
| 13               | 6                | 0              | 0.983852                | 2.133705  | -0.043353 |
| 14               | 1                | 0              | 0.060985                | -2.166505 | 0.568726  |
| 15               | 1                | 0              | -0.073966               | -2.006621 | -1.157099 |
| 16               | 1                | 0              | 0.555672                | 2.886145  | -0.705143 |
| 17               | 1                | 0              | 1.019538                | 2.527840  | 0.974543  |
| 18               | 1                | 0              | 1.973765                | 1.837201  | -0.383402 |

## Decarboxylation pathway for 5-protonated 1-methyl orotate r=2.0

### B3lyp/6-31+G\*

SCF Done: E(RB+HF-LYP) = -642.662399395

Zero-point correction= 0.125946  
(Hartree/Particle)  
Thermal correction to Energy= 0.136895  
Thermal correction to Enthalpy= 0.137839  
Thermal correction to Gibbs Free Energy= 0.087152  
Sum of electronic and zero-point Energies= -642.536454  
Sum of electronic and thermal Energies= -642.525504  
Sum of electronic and thermal Enthalpies= -642.524560  
Sum of electronic and thermal Free Energies= -642.575248

|       | E (Thermal)<br>KCal/Mol | CV<br>Cal/Mol-Kelvin | S<br>Cal/Mol-Kelvin |
|-------|-------------------------|----------------------|---------------------|
| Total | 85.903                  | 38.514               | 106.682             |

Standard orientation:

| Center<br>Number | Atomic<br>Number | Atomic<br>Type | Coordinates (Angstroms) |           |           |
|------------------|------------------|----------------|-------------------------|-----------|-----------|
|                  |                  |                | X                       | Y         | Z         |
| 1                | 7                | 0              | -2.174543               | -0.060731 | 0.008246  |
| 2                | 6                | 0              | -1.663315               | -1.361565 | -0.059283 |
| 3                | 6                | 0              | -0.155275               | -1.429765 | -0.087712 |
| 4                | 6                | 0              | 0.622139                | -0.164409 | -0.047653 |
| 5                | 7                | 0              | -0.014579               | 0.979911  | 0.006082  |
| 6                | 6                | 0              | -1.467788               | 1.120281  | 0.043247  |
| 7                | 1                | 0              | -3.186988               | 0.035574  | 0.033595  |
| 8                | 8                | 0              | -2.405557               | -2.319301 | -0.092307 |
| 9                | 8                | 0              | -1.983944               | 2.210757  | 0.104633  |
| 10               | 6                | 0              | 2.594810                | -0.488730 | 0.010520  |
| 11               | 8                | 0              | 2.672785                | -1.623947 | 0.406855  |
| 12               | 8                | 0              | 3.178209                | 0.497696  | -0.361932 |
| 13               | 6                | 0              | 0.708935                | 2.278370  | 0.051661  |
| 14               | 1                | 0              | 0.205618                | -2.062876 | 0.735540  |
| 15               | 1                | 0              | 0.162081                | -1.995510 | -0.976304 |
| 16               | 1                | 0              | 0.347899                | 2.911396  | -0.760136 |
| 17               | 1                | 0              | 0.497436                | 2.768286  | 1.004172  |
| 18               | 1                | 0              | 1.768834                | 2.062140  | -0.059836 |

## Decarboxylation pathway for 5-protonated 1-methyl orotate r=2.1 (potential energy maximum)

### B3lyp/6-31+G\*

SCF Done: E(RB+HF-LYP) = -642.662009438

Zero-point correction= 0.125786  
(Hartree/Particle)  
Thermal correction to Energy= 0.136851



Thermal correction to Enthalpy= 0.137795  
 Thermal correction to Gibbs Free Energy= 0.086506  
 Sum of electronic and zero-point Energies= -642.536223  
 Sum of electronic and thermal Energies= -642.525158  
 Sum of electronic and thermal Enthalpies= -642.524214  
 Sum of electronic and thermal Free Energies= -642.575503

|       | E (Thermal)<br>KCAL/MOL | CV<br>CAL/MOL-KELVIN | S<br>CAL/MOL-KELVIN |
|-------|-------------------------|----------------------|---------------------|
| TOTAL | 85.875                  | 38.727               | 107.947             |

Standard orientation:

| Center<br>Number | Atomic<br>Number | Atomic<br>Type | Coordinates (Angstroms) |           |           |
|------------------|------------------|----------------|-------------------------|-----------|-----------|
|                  |                  |                | X                       | Y         | Z         |
| 1                | 7                | 0              | -2.194810               | -0.108737 | -0.000110 |
| 2                | 6                | 0              | -1.645241               | -1.394917 | -0.000170 |
| 3                | 6                | 0              | -0.134691               | -1.418159 | -0.000120 |
| 4                | 6                | 0              | 0.613930                | -0.132900 | 0.000030  |
| 5                | 7                | 0              | -0.066219               | 0.990561  | 0.000080  |
| 6                | 6                | 0              | -1.520468               | 1.092423  | 0.000010  |
| 7                | 1                | 0              | -3.209750               | -0.040235 | -0.000150 |
| 8                | 8                | 0              | -2.359403               | -2.375106 | -0.000250 |
| 9                | 8                | 0              | -2.070097               | 2.169103  | 0.000050  |
| 10               | 6                | 0              | 2.703190                | -0.456353 | 0.000080  |
| 11               | 8                | 0              | 2.747898                | -1.652303 | -0.000130 |
| 12               | 8                | 0              | 3.238401                | 0.614247  | 0.000290  |
| 13               | 6                | 0              | 0.619623                | 2.308840  | 0.000220  |
| 14               | 1                | 0              | 0.219118                | -2.012400 | 0.854970  |
| 15               | 1                | 0              | 0.219178                | -2.012220 | -0.855320 |
| 16               | 1                | 0              | 0.318394                | 2.867870  | -0.887650 |
| 17               | 1                | 0              | 0.318264                | 2.867750  | 0.888110  |
| 18               | 1                | 0              | 1.689553                | 2.115339  | 0.000290  |

### Decarboxylation pathway for 5-protonated 1-methyl orotate r=2.2

B3lyp/6-31+G\*

SCF Done: E(RB+HF-LYP) = -642.662204848

Zero-point correction= 0.125673  
 (Hartree/Particle)  
 Thermal correction to Energy= 0.136823  
 Thermal correction to Enthalpy= 0.137768  
 Thermal correction to Gibbs Free Energy= 0.086346  
 Sum of electronic and zero-point Energies= -642.536532  
 Sum of electronic and thermal Energies= -642.525381  
 Sum of electronic and thermal Enthalpies= -642.524437  
 Sum of electronic and thermal Free Energies= -642.575859

|       | E (Thermal)<br>KCal/Mol | CV<br>Cal/Mol-Kelvin | S<br>Cal/Mol-Kelvin |
|-------|-------------------------|----------------------|---------------------|
| Total | 85.858                  | 38.871               | 108.226             |

Standard orientation:

| Center<br>Number | Atomic<br>Number | Atomic<br>Type | Coordinates (Angstroms) |           |           |
|------------------|------------------|----------------|-------------------------|-----------|-----------|
|                  |                  |                | X                       | Y         | Z         |
| 1                | 7                | 0              | 2.209595                | -0.133297 | 0.000263  |
| 2                | 6                | 0              | 1.642629                | -1.411274 | -0.000109 |
| 3                | 6                | 0              | 0.131165                | -1.412212 | 0.001196  |
| 4                | 6                | 0              | -0.605920               | -0.118032 | 0.000423  |
| 5                | 7                | 0              | 0.097354                | 0.993836  | 0.000196  |
| 6                | 6                | 0              | 1.550325                | 1.077011  | 0.000355  |
| 7                | 1                | 0              | 3.225281                | -0.077913 | -0.000363 |
| 8                | 8                | 0              | 2.343411                | -2.401635 | -0.001524 |
| 9                | 8                | 0              | 2.116725                | 2.145713  | 0.000237  |
| 10               | 6                | 0              | -2.782325               | -0.439370 | -0.000165 |
| 11               | 8                | 0              | -2.800971               | -1.630536 | 0.000462  |
| 12               | 8                | 0              | -3.275951               | 0.644808  | -0.000952 |
| 13               | 6                | 0              | -0.570895               | 2.320225  | -0.000387 |
| 14               | 1                | 0              | -0.229090               | -2.003703 | -0.853145 |
| 15               | 1                | 0              | -0.227245               | -2.001117 | 0.858169  |
| 16               | 1                | 0              | -0.265079               | 2.877619  | 0.887129  |
| 17               | 1                | 0              | -0.265065               | 2.876859  | -0.888379 |
| 18               | 1                | 0              | -1.643030               | 2.139593  | -0.000287 |

## Acetamide

### B3lyp/6-31+G\*

SCF Done: E(RB+HF-LYP) = -209.226954130

|                                              |             |
|----------------------------------------------|-------------|
| Zero-point correction=                       | 0.073541    |
| (Hartree/Particle)                           |             |
| Thermal correction to Energy=                | 0.078818    |
| Thermal correction to Enthalpy=              | 0.079762    |
| Thermal correction to Gibbs Free Energy=     | 0.045201    |
| Sum of electronic and zero-point Energies=   | -209.153413 |
| Sum of electronic and thermal Energies=      | -209.148137 |
| Sum of electronic and thermal Enthalpies=    | -209.147192 |
| Sum of electronic and thermal Free Energies= | -209.181753 |

Standard orientation:

| Center<br>Number | Atomic<br>Number | Atomic<br>Type | Coordinates (Angstroms) |           |           |
|------------------|------------------|----------------|-------------------------|-----------|-----------|
|                  |                  |                | X                       | Y         | Z         |
| 1                | 6                | 0              | 1.365103                | -0.347078 | -0.000002 |
| 2                | 6                | 0              | -0.074026               | 0.143884  | -0.000028 |
| 3                | 8                | 0              | -0.355569               | 1.336431  | 0.000015  |
| 4                | 7                | 0              | -1.038984               | -0.827036 | -0.000086 |
| 5                | 1                | 0              | -2.009844               | -0.542770 | 0.000243  |
| 6                | 1                | 0              | 1.460448                | -1.437721 | -0.001103 |
| 7                | 1                | 0              | 1.872965                | 0.056118  | -0.881877 |
| 8                | 1                | 0              | 1.872311                | 0.054239  | 0.883119  |
| 9                | 1                | 0              | -0.824907               | -1.812896 | 0.000277  |

## 1-methyl orotate acetamide complex

### B3lyp/6-31+G\*

SCF Done: E(RB+HF-LYP) = -851.447424459

Zero-point correction= 0.191988  
(Hartree/Particle)  
Thermal correction to Energy= 0.209173  
Thermal correction to Enthalpy= 0.210117  
Thermal correction to Gibbs Free Energy= 0.142827  
Sum of electronic and zero-point Energies= -851.255437  
Sum of electronic and thermal Energies= -851.238252  
Sum of electronic and thermal Enthalpies= -851.237307  
Sum of electronic and thermal Free Energies= -851.304598

Standard orientation:

| Center<br>Number | Atomic<br>Number | Atomic<br>Type | Coordinates (Angstroms) |           |           |
|------------------|------------------|----------------|-------------------------|-----------|-----------|
|                  |                  |                | X                       | Y         | Z         |
| 1                | 6                | 0              | 5.675871                | -0.041277 | 0.063035  |
| 2                | 6                | 0              | 4.156486                | -0.139702 | 0.008643  |
| 3                | 8                | 0              | 3.462380                | 0.881724  | 0.009291  |
| 4                | 7                | 0              | 3.624429                | -1.382637 | -0.039750 |
| 5                | 7                | 0              | -1.379838               | -0.802044 | -0.068332 |
| 6                | 6                | 0              | -0.013114               | -0.591593 | -0.062633 |
| 7                | 7                | 0              | 0.394184                | 0.716250  | -0.012744 |
| 8                | 6                | 0              | -0.440486               | 1.859866  | 0.028099  |
| 9                | 6                | 0              | -1.843808               | 1.544335  | 0.020936  |
| 10               | 6                | 0              | -2.284987               | 0.254226  | -0.010778 |
| 11               | 8                | 0              | 0.800759                | -1.536162 | -0.103922 |
| 12               | 8                | 0              | 0.071483                | 2.981404  | 0.064175  |
| 13               | 6                | 0              | -1.870854               | -2.187000 | -0.112084 |
| 14               | 1                | 0              | 2.598210                | -1.488750 | -0.067130 |
| 15               | 1                | 0              | 6.180155                | -1.013844 | 0.043496  |
| 16               | 1                | 0              | 6.020593                | 0.557274  | -0.786480 |
| 17               | 1                | 0              | 5.961611                | 0.490575  | 0.976595  |
| 18               | 1                | 0              | -2.648100               | -2.265375 | -0.875908 |
| 19               | 1                | 0              | -1.030241               | -2.833578 | -0.356817 |
| 20               | 1                | 0              | -2.302483               | -2.457887 | 0.854234  |
| 21               | 6                | 0              | -3.786079               | -0.112900 | 0.055015  |
| 22               | 8                | 0              | -4.442167               | 0.140679  | -0.978773 |
| 23               | 8                | 0              | -4.126407               | -0.625055 | 1.148467  |
| 24               | 1                | 0              | -2.554257               | 2.361030  | 0.039580  |
| 25               | 1                | 0              | 1.407540                | 0.877767  | -0.008124 |
| 26               | 1                | 0              | 4.208989                | -2.204651 | -0.028955 |

ONSAGER

## 6-deprotonated 1-methyl uracil

### B3lyp/6-31+G\*

SCF Done: E(RB+HF-LYP) = -453.558923424

Zero-point correction= 0.100846  
(Hartree/Particle)  
Thermal correction to Energy= 0.108480  
Thermal correction to Enthalpy= 0.109424  
Thermal correction to Gibbs Free Energy= 0.068517  
Sum of electronic and zero-point Energies= -453.458078  
Sum of electronic and thermal Energies= -453.450443  
Sum of electronic and thermal Enthalpies= -453.449499  
Sum of electronic and thermal Free Energies= -453.490406

---

| Center<br>Number | Atomic<br>Number | Atomic<br>Type | Coordinates (Angstroms) |           |           |
|------------------|------------------|----------------|-------------------------|-----------|-----------|
|                  |                  |                | X                       | Y         | Z         |
| 1                | 7                | 0              | -1.068698               | -0.514797 | -0.000020 |
| 2                | 6                | 0              | -0.658889               | 0.810380  | -0.000005 |
| 3                | 7                | 0              | 0.714308                | 0.980623  | -0.000012 |
| 4                | 6                | 0              | 1.693769                | -0.031080 | 0.000003  |
| 5                | 6                | 0              | 1.131358                | -1.348690 | 0.000003  |
| 6                | 6                | 0              | -0.228857               | -1.639135 | -0.000006 |
| 7                | 6                | 0              | -2.521696               | -0.702404 | -0.000007 |
| 8                | 8                | 0              | -1.430583               | 1.777616  | 0.000024  |
| 9                | 1                | 0              | 1.036589                | 1.941216  | 0.000008  |
| 10               | 8                | 0              | 2.898699                | 0.308662  | 0.000011  |
| 11               | 1                | 0              | 1.851561                | -2.165988 | 0.000012  |
| 12               | 1                | 0              | -2.694207               | -1.778375 | -0.000147 |
| 13               | 1                | 0              | -2.976109               | -0.241270 | 0.884710  |
| 14               | 1                | 0              | -2.976149               | -0.241017 | -0.884568 |

---

## 1-methyl orotate

### B3lyp/6-31+G\*

SCF Done: E(RB+HF-LYP) = -642.212109454

Zero-point correction= 0.116156  
(Hartree/Particle)  
Thermal correction to Energy= 0.126794  
Thermal correction to Enthalpy= 0.127738  
Thermal correction to Gibbs Free Energy= 0.078434  
Sum of electronic and zero-point Energies= -642.095954  
Sum of electronic and thermal Energies= -642.085316  
Sum of electronic and thermal Enthalpies= -642.084372  
Sum of electronic and thermal Free Energies= -642.133676

---

|       | E (Thermal)<br>KCal/Mol | CV<br>Cal/Mol-Kelvin | S<br>Cal/Mol-Kelvin |
|-------|-------------------------|----------------------|---------------------|
| Total | 79.564                  | 37.632               | 103.769             |

---

| Center Number | Atomic Number | Atomic Type | Coordinates (Angstroms) |           |           |
|---------------|---------------|-------------|-------------------------|-----------|-----------|
|               |               |             | X                       | Y         | Z         |
| 1             | 7             | 0           | 0.117932                | 0.923821  | -0.073458 |
| 2             | 6             | 0           | -1.255512               | 1.188861  | -0.045290 |
| 3             | 7             | 0           | -2.058773               | 0.063945  | 0.029352  |
| 4             | 6             | 0           | -1.655652               | -1.282080 | 0.063281  |
| 5             | 6             | 0           | -0.226186               | -1.444014 | 0.021337  |
| 6             | 6             | 0           | 0.615522                | -0.368902 | -0.026762 |
| 7             | 6             | 0           | 1.019860                | 2.081114  | -0.156185 |
| 8             | 8             | 0           | -1.729243               | 2.319726  | -0.084529 |
| 9             | 1             | 0           | -3.056482               | 0.247540  | 0.049888  |
| 10            | 8             | 0           | -2.506647               | -2.176489 | 0.122832  |
| 11            | 1             | 0           | 0.179153                | -2.447373 | 0.021797  |
| 12            | 6             | 0           | 2.150775                | -0.576051 | 0.034926  |
| 13            | 8             | 0           | 2.643267                | -1.245711 | -0.904687 |
| 14            | 8             | 0           | 2.699619                | -0.071089 | 1.045388  |
| 15            | 1             | 0           | 1.739789                | 1.923553  | -0.963726 |
| 16            | 1             | 0           | 0.410004                | 2.959359  | -0.361889 |
| 17            | 1             | 0           | 1.564617                | 2.197493  | 0.782791  |

**2-protonated, 6-deprotonated 1-methyl uracil  
 (favored conformer, proton toward N1-methyl)**

**B3lyp/6-31+G\***

SCF Done: E(RB+HF-LYP) = -454.047688581

Zero-point correction= 0.112999  
 (Hartree/Particle)  
 Thermal correction to Energy= 0.120994  
 Thermal correction to Enthalpy= 0.121938  
 Thermal correction to Gibbs Free Energy= 0.080532  
 Sum of electronic and zero-point Energies= -453.934690  
 Sum of electronic and thermal Energies= -453.926694  
 Sum of electronic and thermal Enthalpies= -453.925750  
 Sum of electronic and thermal Free Energies= -453.967157

|       | E (Thermal)<br>KCal/Mol | CV<br>Cal/Mol-Kelvin | S<br>Cal/Mol-Kelvin |
|-------|-------------------------|----------------------|---------------------|
| Total | 75.925                  | 30.079               | 87.147              |

| Center Number | Atomic Number | Atomic Type | Coordinates (Angstroms) |           |           |
|---------------|---------------|-------------|-------------------------|-----------|-----------|
|               |               |             | X                       | Y         | Z         |
| 1             | 7             | 0           | -0.704103               | 0.981459  | -0.000100 |
| 2             | 6             | 0           | -1.733650               | -0.017515 | -0.000100 |
| 3             | 6             | 0           | -1.189790               | -1.345139 | -0.000100 |
| 4             | 6             | 0           | 0.148625                | -1.685151 | 0.000115  |
| 5             | 7             | 0           | 1.032065                | -0.550182 | 0.000169  |
| 6             | 6             | 0           | 0.606277                | 0.710909  | 0.000027  |
| 7             | 1             | 0           | -0.991728               | 1.956021  | -0.000206 |
| 8             | 8             | 0           | -2.906757               | 0.361483  | -0.000527 |
| 9             | 1             | 0           | -1.927664               | -2.144026 | -0.000298 |

|    |   |   |          |           |           |
|----|---|---|----------|-----------|-----------|
| 10 | 8 | 0 | 1.389991 | 1.786109  | 0.000070  |
| 11 | 6 | 0 | 2.485537 | -0.810325 | 0.000395  |
| 12 | 1 | 0 | 2.592196 | -1.893432 | 0.000274  |
| 13 | 1 | 0 | 2.961557 | -0.404977 | -0.900292 |
| 14 | 1 | 0 | 2.961227 | -0.405216 | 0.901364  |
| 15 | 1 | 0 | 2.340811 | 1.575277  | 0.000308  |

**2-protonated 1-methyl orotate (favored conformer,  
 proton toward N1-methyl)**

**B3lyp/6-31+G\***

SCF Done: E(RB+HF-LYP) = -642.675650378

Zero-point correction= 0.128279  
 (Hartree/Particle)  
 Thermal correction to Energy= 0.138912  
 Thermal correction to Enthalpy= 0.139857  
 Thermal correction to Gibbs Free Energy= 0.091357  
 Sum of electronic and zero-point Energies= -642.547371  
 Sum of electronic and thermal Energies= -642.536738  
 Sum of electronic and thermal Enthalpies= -642.535794  
 Sum of electronic and thermal Free Energies= -642.584293

|       | E (Thermal) | CV             | S              |
|-------|-------------|----------------|----------------|
|       | KCal/Mol    | Cal/Mol-Kelvin | Cal/Mol-Kelvin |
| Total | 87.169      | 39.290         | 102.075        |

| Center<br>Number | Atomic<br>Number | Atomic<br>Type | Coordinates (Angstroms) |           |           |
|------------------|------------------|----------------|-------------------------|-----------|-----------|
|                  |                  |                | X                       | Y         | Z         |
| 1                | 7                | 0              | 2.040935                | -0.160342 | -0.050409 |
| 2                | 6                | 0              | 1.476285                | -1.472846 | -0.061282 |
| 3                | 6                | 0              | 0.034762                | -1.444124 | 0.011286  |
| 4                | 6                | 0              | -0.693360               | -0.299786 | 0.046293  |
| 5                | 7                | 0              | -0.016684               | 0.950448  | 0.043009  |
| 6                | 6                | 0              | 1.327713                | 0.969261  | 0.018396  |
| 7                | 1                | 0              | 3.058306                | -0.077867 | -0.071513 |
| 8                | 8                | 0              | 2.202978                | -2.447706 | -0.124912 |
| 9                | 1                | 0              | -0.495959               | -2.385585 | 0.041605  |
| 10               | 8                | 0              | 2.051486                | 2.062568  | 0.062756  |
| 11               | 6                | 0              | -2.268332               | -0.431454 | -0.014106 |
| 12               | 8                | 0              | -2.875378               | 0.509494  | -0.569638 |
| 13               | 8                | 0              | -2.689901               | -1.511288 | 0.452308  |
| 14               | 6                | 0              | -0.724468               | 2.254757  | 0.151260  |
| 15               | 1                | 0              | -1.787755               | 2.047788  | 0.041675  |
| 16               | 1                | 0              | -0.509832               | 2.714528  | 1.121215  |
| 17               | 1                | 0              | -0.421813               | 2.909112  | -0.672237 |
| 18               | 1                | 0              | 1.558227                | 2.901881  | 0.115859  |

### 4-protonated, 6-deprotonated 1-methyl uracil (favored conformer, proton toward C5)

#### B3lyp/6-31+G\*

SCF Done: E(RB+HF-LYP) = -454.064847101

Zero-point correction= 0.113757  
(Hartree/Particle)  
Thermal correction to Energy= 0.121598  
Thermal correction to Enthalpy= 0.122542  
Thermal correction to Gibbs Free Energy= 0.081457  
Sum of electronic and zero-point Energies= -453.951090  
Sum of electronic and thermal Energies= -453.943249  
Sum of electronic and thermal Enthalpies= -453.942305  
Sum of electronic and thermal Free Energies= -453.983390

|       | E (Thermal)<br>KCal/Mol | CV<br>Cal/Mol-Kelvin | S<br>Cal/Mol-Kelvin |
|-------|-------------------------|----------------------|---------------------|
| Total | 76.304                  | 29.639               | 86.470              |

| Center<br>Number | Atomic<br>Number | Atomic<br>Type | Coordinates (Angstroms) |           |           |
|------------------|------------------|----------------|-------------------------|-----------|-----------|
|                  |                  |                | X                       | Y         | Z         |
| 1                | 7                | 0              | 0.679978                | 0.980696  | -0.000004 |
| 2                | 6                | 0              | 1.562308                | -0.057292 | -0.000040 |
| 3                | 6                | 0              | 1.088630                | -1.348974 | -0.000045 |
| 4                | 6                | 0              | -0.301519               | -1.633263 | -0.000014 |
| 5                | 7                | 0              | -1.106229               | -0.520091 | 0.000021  |
| 6                | 6                | 0              | -0.700730               | 0.820962  | 0.000029  |
| 7                | 1                | 0              | 1.025996                | 1.935087  | 0.000000  |
| 8                | 8                | 0              | 2.835404                | 0.363437  | -0.000067 |
| 9                | 1                | 0              | 1.797343                | -2.172986 | -0.000074 |
| 10               | 8                | 0              | -1.463535               | 1.778856  | 0.000061  |
| 11               | 6                | 0              | -2.566747               | -0.698146 | 0.000055  |
| 12               | 1                | 0              | -2.744075               | -1.772234 | 0.000046  |
| 13               | 1                | 0              | -3.005666               | -0.230676 | 0.887316  |
| 14               | 1                | 0              | -3.005710               | -0.230653 | -0.887171 |
| 15               | 1                | 0              | 3.449263                | -0.390843 | -0.000092 |

### 4-protonated 1-methyl orotate (favored conformer, proton toward C5)

#### B3lyp/6-31+G\*

SCF Done: E(RB+HF-LYP) = -642.686025156

Zero-point correction= 0.128437  
(Hartree/Particle)  
Thermal correction to Energy= 0.139450  
Thermal correction to Enthalpy= 0.140394  
Thermal correction to Gibbs Free Energy= 0.090112  
Sum of electronic and zero-point Energies= -642.557589  
Sum of electronic and thermal Energies= -642.546575  
Sum of electronic and thermal Enthalpies= -642.545631  
Sum of electronic and thermal Free Energies= -642.595914

|       | E (Thermal)<br>KCal/Mol | CV<br>Cal/Mol-Kelvin | S<br>Cal/Mol-Kelvin |
|-------|-------------------------|----------------------|---------------------|
| Total | 87.506                  | 39.329               | 105.829             |

| Center<br>Number | Atomic<br>Number | Atomic<br>Type | Coordinates (Angstroms) |           |           |
|------------------|------------------|----------------|-------------------------|-----------|-----------|
|                  |                  |                | X                       | Y         | Z         |
| 1                | 7                | 0              | 2.020369                | 0.252843  | -0.002614 |
| 2                | 6                | 0              | 1.682438                | -1.060806 | 0.013964  |
| 3                | 6                | 0              | 0.344978                | -1.421896 | 0.012673  |
| 4                | 6                | 0              | -0.616644               | -0.410054 | -0.005790 |
| 5                | 7                | 0              | -0.238754               | 0.895918  | -0.034330 |
| 6                | 6                | 0              | 1.108493                | 1.309271  | -0.016252 |
| 7                | 1                | 0              | 3.004758                | 0.515389  | 0.005668  |
| 8                | 8                | 0              | 2.737035                | -1.861186 | 0.030230  |
| 9                | 1                | 0              | 0.040297                | -2.461003 | 0.022093  |
| 10               | 8                | 0              | 1.462412                | 2.468634  | -0.015329 |
| 11               | 6                | 0              | -1.254289               | 1.966765  | -0.040877 |
| 12               | 1                | 0              | -0.756285               | 2.897080  | -0.306408 |
| 13               | 1                | 0              | -2.020535               | 1.712183  | -0.774347 |
| 14               | 1                | 0              | -1.703405               | 2.044280  | 0.952147  |
| 15               | 1                | 0              | 2.497468                | -2.804396 | 0.041763  |
| 16               | 6                | 0              | -2.130982               | -0.715122 | 0.013307  |
| 17               | 8                | 0              | -2.613320               | -0.940038 | -1.113858 |
| 18               | 8                | 0              | -2.628322               | -0.661635 | 1.155899  |

## 5-protonated, 6-deprotonated 1-methyl uracil

### B3lyp/6-31+G\*

SCF Done: E(RB+HF-LYP) = -454.073693767

|                                              |             |
|----------------------------------------------|-------------|
| Zero-point correction=                       | 0.112936    |
| (Hartree/Particle)                           |             |
| Thermal correction to Energy=                | 0.121080    |
| Thermal correction to Enthalpy=              | 0.122025    |
| Thermal correction to Gibbs Free Energy=     | 0.079423    |
| Sum of electronic and zero-point Energies=   | -453.960758 |
| Sum of electronic and thermal Energies=      | -453.952613 |
| Sum of electronic and thermal Enthalpies=    | -453.951669 |
| Sum of electronic and thermal Free Energies= | -453.994271 |

|       | E (Thermal)<br>KCal/Mol | CV<br>Cal/Mol-Kelvin | S<br>Cal/Mol-Kelvin |
|-------|-------------------------|----------------------|---------------------|
| Total | 75.979                  | 29.439               | 89.662              |

| Center<br>Number | Atomic<br>Number | Atomic<br>Type | Coordinates (Angstroms) |           |           |
|------------------|------------------|----------------|-------------------------|-----------|-----------|
|                  |                  |                | X                       | Y         | Z         |
| 1                | 7                | 0              | 0.716938                | 1.030702  | 0.000089  |
| 2                | 6                | 0              | 1.699855                | 0.045329  | -0.000093 |
| 3                | 6                | 0              | 1.144544                | -1.363888 | 0.000197  |
| 4                | 6                | 0              | -0.335657               | -1.616510 | -0.000026 |



|    |   |   |           |           |           |
|----|---|---|-----------|-----------|-----------|
| 5  | 7 | 0 | -1.096566 | -0.527194 | -0.000022 |
| 6  | 6 | 0 | -0.655275 | 0.846145  | 0.000163  |
| 7  | 1 | 0 | 1.024414  | 1.999840  | 0.000021  |
| 8  | 8 | 0 | 2.881378  | 0.339573  | -0.000311 |
| 9  | 1 | 0 | 1.569314  | -1.901570 | -0.860159 |
| 10 | 8 | 0 | -1.434578 | 1.774511  | 0.000161  |
| 11 | 6 | 0 | -2.572774 | -0.665511 | -0.000184 |
| 12 | 1 | 0 | 1.568807  | -1.900986 | 0.861186  |
| 13 | 1 | 0 | -2.992133 | -0.186961 | -0.888142 |
| 14 | 1 | 0 | -2.779260 | -1.733699 | -0.000370 |
| 15 | 1 | 0 | -2.992296 | -0.187245 | 0.887850  |

## 5-protonated 1-methyl orotate

### B3lyp/6-31+G\*

SCF Done: E(RB+HF-LYP) = -642.684867538

|                                              |             |
|----------------------------------------------|-------------|
| Zero-point correction=                       | 0.127564    |
| (Hartree/Particle)                           |             |
| Thermal correction to Energy=                | 0.138881    |
| Thermal correction to Enthalpy=              | 0.139825    |
| Thermal correction to Gibbs Free Energy=     | 0.088358    |
| Sum of electronic and zero-point Energies=   | -642.557304 |
| Sum of electronic and thermal Energies=      | -642.545987 |
| Sum of electronic and thermal Enthalpies=    | -642.545042 |
| Sum of electronic and thermal Free Energies= | -642.596510 |

|       | E (Thermal) | CV             | S              |
|-------|-------------|----------------|----------------|
|       | KCal/Mol    | Cal/Mol-Kelvin | Cal/Mol-Kelvin |
| Total | 87.149      | 39.140         | 108.322        |

| Center<br>Number | Atomic<br>Number | Atomic<br>Type | Coordinates (Angstroms) |           |           |
|------------------|------------------|----------------|-------------------------|-----------|-----------|
|                  |                  |                | X                       | Y         | Z         |
| 1                | 7                | 0              | -2.087290               | 0.128352  | 0.002737  |
| 2                | 6                | 0              | -1.733236               | -1.219285 | -0.035011 |
| 3                | 6                | 0              | -0.246209               | -1.479584 | -0.160409 |
| 4                | 6                | 0              | 0.663409                | -0.301639 | -0.072077 |
| 5                | 7                | 0              | 0.182090                | 0.920069  | -0.047580 |
| 6                | 6                | 0              | -1.247437               | 1.221508  | 0.009105  |
| 7                | 1                | 0              | -3.081514               | 0.346221  | 0.065078  |
| 8                | 8                | 0              | -2.557668               | -2.102591 | 0.016529  |
| 9                | 8                | 0              | -1.617500               | 2.364361  | 0.067243  |
| 10               | 6                | 0              | 2.165139                | -0.591050 | 0.030164  |
| 11               | 8                | 0              | 2.457565                | -0.831762 | 1.219897  |
| 12               | 8                | 0              | 2.802104                | -0.575245 | -1.034036 |
| 13               | 6                | 0              | 1.060064                | 2.114061  | -0.003914 |
| 14               | 1                | 0              | 0.053742                | -2.211623 | 0.597833  |
| 15               | 1                | 0              | -0.063778               | -1.966997 | -1.130050 |
| 16               | 1                | 0              | 0.638568                | 2.875500  | -0.658744 |
| 17               | 1                | 0              | 1.092117                | 2.496783  | 1.018515  |
| 18               | 1                | 0              | 2.050875                | 1.819007  | -0.342949 |

## Decarboxylation pathway for 5-protonated 1-methyl orotate r=2.3 (potential energy maximum)

### B3lyp/6-31+G\*

SCF Done: E(RB+HF-LYP) = -642.664021354

Zero-point correction= 0.125453  
(Hartree/Particle)  
Thermal correction to Energy= 0.136689  
Thermal correction to Enthalpy= 0.137633  
Thermal correction to Gibbs Free Energy= 0.085926  
Sum of electronic and zero-point Energies= -642.538569  
Sum of electronic and thermal Energies= -642.527332  
Sum of electronic and thermal Enthalpies= -642.526388  
Sum of electronic and thermal Free Energies= -642.578096

|       | E (Thermal)<br>KCal/Mol | CV<br>Cal/Mol-Kelvin | S<br>Cal/Mol-Kelvin |
|-------|-------------------------|----------------------|---------------------|
| Total | 85.774                  | 39.038               | 108.827             |

| Center<br>Number | Atomic<br>Number | Atomic<br>Type | Coordinates (Angstroms) |           |           |
|------------------|------------------|----------------|-------------------------|-----------|-----------|
|                  |                  |                | X                       | Y         | Z         |
| 1                | 7                | 0              | -2.223159               | -0.155742 | -0.000006 |
| 2                | 6                | 0              | -1.639842               | -1.423063 | 0.000019  |
| 3                | 6                | 0              | -0.127061               | -1.405410 | 0.000056  |
| 4                | 6                | 0              | 0.598100                | -0.103317 | 0.000030  |
| 5                | 7                | 0              | -0.119495               | 0.997498  | 0.000002  |
| 6                | 6                | 0              | -1.577214               | 1.063639  | -0.000015 |
| 7                | 1                | 0              | -3.240053               | -0.110365 | -0.000025 |
| 8                | 8                | 0              | -2.320044               | -2.428364 | 0.000014  |
| 9                | 8                | 0              | -2.151476               | 2.125376  | -0.000039 |
| 10               | 6                | 0              | 2.828914                | -0.421967 | -0.000006 |
| 11               | 8                | 0              | 2.844507                | -1.612910 | -0.000138 |
| 12               | 8                | 0              | 3.310882                | 0.665169  | 0.000102  |
| 13               | 6                | 0              | 0.528266                | 2.333720  | -0.000016 |
| 14               | 1                | 0              | 0.234989                | -1.990746 | 0.857483  |
| 15               | 1                | 0              | 0.235041                | -1.990817 | -0.857299 |
| 16               | 1                | 0              | 0.213844                | 2.887056  | -0.887005 |
| 17               | 1                | 0              | 0.213821                | 2.887091  | 0.886943  |
| 18               | 1                | 0              | 1.603005                | 2.169716  | 0.000005  |
